# Supplementary material
Source: HighWire-hosted journal article supplement (https://www.qdcxjkg.com/highwire/filestream/113551/field_highwire_adjunct_files/0/strippedCME36.4.pdf)
Supplement: strippedCME36.4.pdf [file strippedCME36.4.pdf]

# CME Credit Application Form

## (1 CME credit)

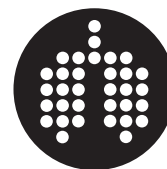

To receive CME credits, read the CME article in this issue, indicate the correct responses to the educational questions and complete the requested information. This form is also available in electronic format at [www.erj.ersjournals.com/current.dtl](http://www.erj.ersjournals.com/current.dtl). To return your application, you can either:

- use this form and return it completed to ERS Publications Office, 442 Glossop Road, Sheffield, S10 2PX, UK; fax to +44-114-2665064; or e-mail to [info@ersj.org.uk](mailto:info@ersj.org.uk)
- fill in the online form at [www.erj.ersjournals.com/current.dtl](http://www.erj.ersjournals.com/current.dtl)

Certificates will be e-mailed to the address filled in below. Please allow 4 weeks for processing.

**CME credit applications are now free of charge.**

### Applicant personal details.

ERS Membership No. (if known): ..... Date of Birth (DD/MM/YYYY): .....

Family Name: ..... First Name: .....

Mailing Address: .....

Postal Code: ..... City: ..... Country: .....

Telephone: + ..... E-mail: .....

### Educational questions.

#### “Pregnancy and fetal outcomes of symptoms of sleep-disordered breathing”

For each statement, mark appropriately in every box with a (+) for true or (-) for false.

#### 1. Which of the following is true regarding pregnancy?

Snoring occurs more commonly in pregnancy because of pregnancy-specific physiologic changes.  Pregnancy does not appear to have any effect on incidence of snoring.  Pregnant women snore less than non-pregnant females because they are generally younger and healthier.

#### 2. Which if the following is true regarding snoring in pregnancy:

Snoring correlates with pre-pregnancy body mass index (BMI) only since obesity is a risk factor for sleep disordered breathing outside of pregnancy.  Snoring does not correlate with weight gain since weight gain occurs mainly below the diaphragm.  Snoring correlates with pre-pregnancy BMI and weight gain.

#### 3. Which of the following is true regarding snoring and the risk of sleep disordered breathing in pregnancy?

Snoring is a stronger predictor of sleep disordered breathing in pregnancy given the extent of weight gained in a short period of time.  Preliminary data suggest that symptoms of sleep disordered breathing may not be as predictive of the disorder in pregnancy as they are outside of pregnancy.  Any questionnaire that is validated outside of pregnancy can be used in the pregnant population to predict sleep disordered breathing.

#### 4. Sleep disordered breathing and pregnancy outcomes:

Snoring does not appear to be associated with pregnancy induced hypertension and preeclampsia.  Endothelial dysfunction is a potential link in the association of gestational hypertensive disorders and sleep disordered breathing.  There are no data to suggest that hypoxia is associated with adverse pregnancy or fetal outcomes.
